# Supplementary material
Source: HighWire-hosted journal article supplement (https://www.annfammed.org/highwire/filestream/17081/field_highwire_adjunct_files/0/Ruiz-Supp.pdf)
Supplement: Ruiz-Supp.pdf [file Ruiz-Supp.pdf]

## Supplemental materials for

Ruiz J. Closing the gap: how a community effort can improve rural maternity care. *Ann Fam Med*. 2024;22(1):68.

---

## References

1. Hoyert DL. Maternal mortality rates in the United States, 2021. NCHS Health E-Stats. Published 2023. <https://www.cdc.gov/nchs/data/hestat/maternal-mortality/2021/maternal-mortality-rates-2021.pdf>
2. Deutchman M, Macaluso F, Bray E, et al. The impact of family physicians in rural maternity care. *Birth*. 2022;49(2):220-232. [10.1111/birt.12591](https://doi.org/10.1111/birt.12591)
3. Patterson DG, Andrilla CHA, Garberson LA. *The Supply and Rural-Urban Distribution of the Obstetrical Care Workforce in the U.S.* Policy Brief #168. WWAMI Rural Health Research Center, University of Washington; 2020.
4. Avery DM Jr, McDonald JT Jr. The declining number of family physicians practicing obstetrics. Accessed Apr 17, 2023. <http://aapsus.org/wp-content/uploads/The-Declining-Number-of-Family-Physicians-Practicing-Obstetrics1.pdf>
